# Supplementary material for: Biodegradation of Dimethyl Phthalate by Freshwater Unicellular Cyanobacteria
Source: Hindawi journal article supplement (doi:10.1155/2016/5178697), 2016-01-01
Supplement: f1 [file 5178697.f1.pdf]

Figure S1. High performance liquid chromatography of DMP and its degradation metabolites MMP and PA by *Cyanothce* sp. PCC7822 showing the degrading intermediates standardized by references.

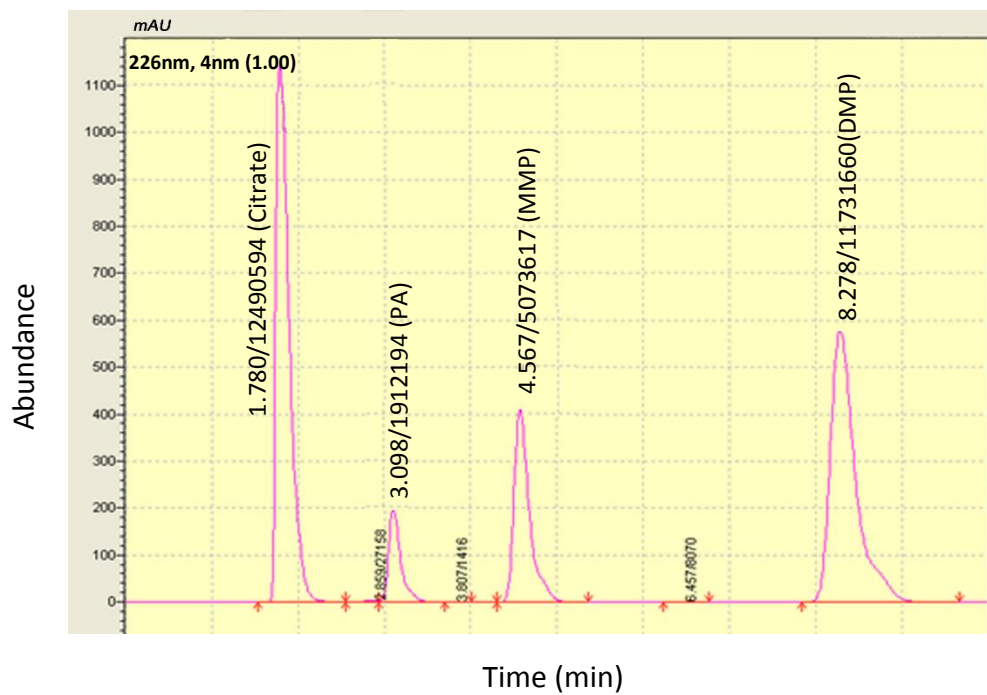

Figure S1
